# Supplementary material for: Reproduction Number of the Omicron Variant Triples That of the Delta Variant
Source: Viruses. 2022 Apr 15;14(4):821. doi: 10.3390/v14040821 (PMC9027795; doi:10.3390/v14040821)
Supplement: Supplementary file 1 [file viruses-14-00821-s001.zip › viruses-1657773-supplementary.pdf]

Supplementary Materials

# Reproduction Number of the Omicron Variant Triples That of the Delta Variant

**Table S1.** Description of studies included for the Omicron variant of SARS-CoV-2.

| Study | $R_0$<br>(mean<br>and<br>95%<br>CI) | $R_e$<br>(mean and<br>95% CI) | $R_e/R_\delta$<br>(mean and<br>95% CI) | $R_\delta$                                                                         | Period                   | Region                        | Method                               | Substrain                  |
|-------|-------------------------------------|-------------------------------|----------------------------------------|------------------------------------------------------------------------------------|--------------------------|-------------------------------|--------------------------------------|----------------------------|
| [3]   |                                     | 5.11~<br>(4.30-6.01)          | 3.31*<br>(2.95-3.72)                   | 1.54 (95% CI,<br>1.27-1.81), as<br>the pooled es-<br>timate over re-<br>gions [10] | 2021-01-01<br>2021-12-24 | South Af-<br>rica             | Bayesian sta-<br>tistical<br>model   | BA.1 [4]                   |
| [5]   |                                     | 4.93~<br>(4.13-5.82)          | 3.19<br>(2.82-3.61)                    | 1.54 (95% CI,<br>1.27-1.81), as<br>the pooled es-<br>timate over re-<br>gions [10] | 2021-11-01<br>2022-01-08 | Denmark                       | Maximum<br>likelihood<br>method      | BA.1, BA.2,<br>BA.1.1 [4]  |
| [6]   |                                     | 7.57~<br>(4.12-12.7)          | 4.20<br>(2.10-9.10)                    | 1.54 (95% CI,<br>1.27-1.81), as<br>the pooled es-<br>timate over re-<br>gions [10] | 2021-09-23<br>2021-11-18 | Gauteng,<br>South Af-<br>rica | Maximum<br>likelihood<br>method      | BA.1 [4]                   |
| [7]   | 1.3<br>(0.8-<br>2.0)                | 2.43<br>(1.05-5.49)           | 1.74#<br>(0.66-4.86)                   | 1.24 (95% CI,<br>0.47-3.52)<br>in China [10]                                       | 2022-01-12<br>2022-01-21 | Zhuhai,<br>China              | Maximum<br>likelihood<br>method      | BA.1                       |
| [8]   |                                     | 4.0                           | 3.05*<br>(2.35-4.82)                   | 1.39 (95% CI,<br>0.69-1.81) in<br>England [10]                                     | 2021-12-01<br>2022-04-30 | England                       | Exponential<br>growth rate<br>method | BA.1, BA.2 ,<br>BA.1.1 [4] |
| [9]   |                                     | 2.57<br>(1.34-3.57)           | 1.60#<br>(1.02-2.26)                   | 1.54 (95% CI,<br>1.27-1.81), as<br>the pooled es-<br>timate over re-<br>gions [10] | 2021-12-28<br>2022-01-10 | India                         | Maximum<br>likelihood<br>method      | BA.1, BA.2,<br>BA.1.1 [4]  |

Note: \* The reproduction number is reported by median and 95% credible interval (CrI); ~ We assume that both  $R_\delta$  for the Delta variant and relative change  $R_e/R_\delta$  follow triangular distributions. We assume the lower limit, upper limit, and mode of the triangular distribution as the lower and upper 95% CI and the mean estimates, respectively. We generate 10,000 pairs based on triangular distributions of reproduction number for both  $R_e$  and  $R_e/R_\delta$ , respectively. By multiplying  $R_\delta$  and  $R_e/R_\delta$  in each pair, we can estimate  $R_e$  for the Omicron variant and conduct the statistics analysis; # We assume that effective reproduction numbers of  $R_\delta$  for both the Delta variant and  $R_\delta$  for the Omicron variant follow triangular distributions. We assume the lower limit, upper limit, and mode of the triangular distribution as the lower and upper 95% CI and the mean

estimates, respectively. We generate 10,000 pairs based on triangular distributions of reproduction number for both  $R_e$  and  $R_e/R_\delta$ , respectively. By dividing  $R_e$  into  $R_e/R_\delta$  in each pair, we can estimate  $R_e$  for the Omicron variant.
